# Supplementary material for: Biodegradable Poly(Amino Ester) with Aromatic Backbone as Efficient Nonviral Gene Delivery Vectors
Source: MDPI journal article supplement (doi:10.3390/molecules22040566), 2017-03-31

# Supplementary Information: Biodegradable poly(amino ester) with aromatic backbone as efficient nonviral gene delivery vectors

Qiang Liu, Rong-Chuan Su, Wen-Jing Yi\* and Zhi-Gang Zhao\*

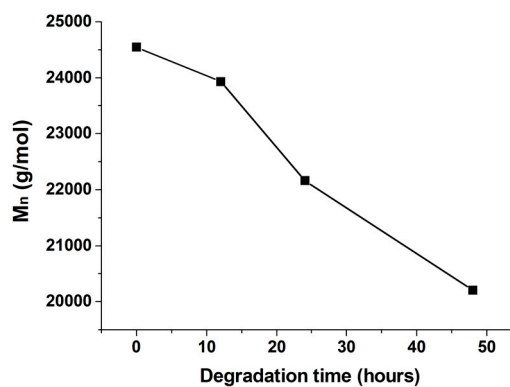

**Figure S1.** Change of molecular weight of **P2** ( $M_n = 24,550$  Da) with degradation time in PBS (pH = 7.4).

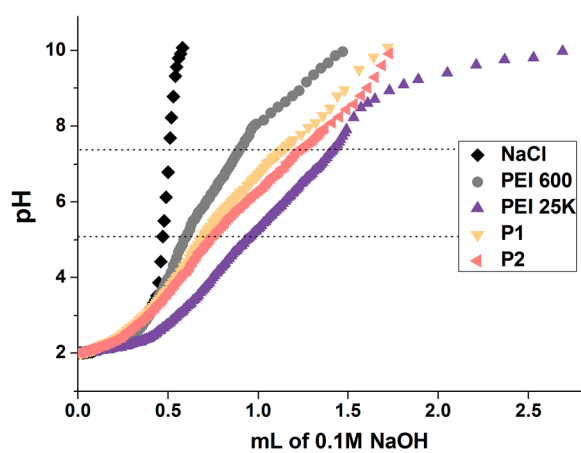

**Figure S2.** Acid-base titration profiles of **P1**, **P2** and **PEI**.

## Spectra

### a. $^1\text{H}$ -NMR Spectra

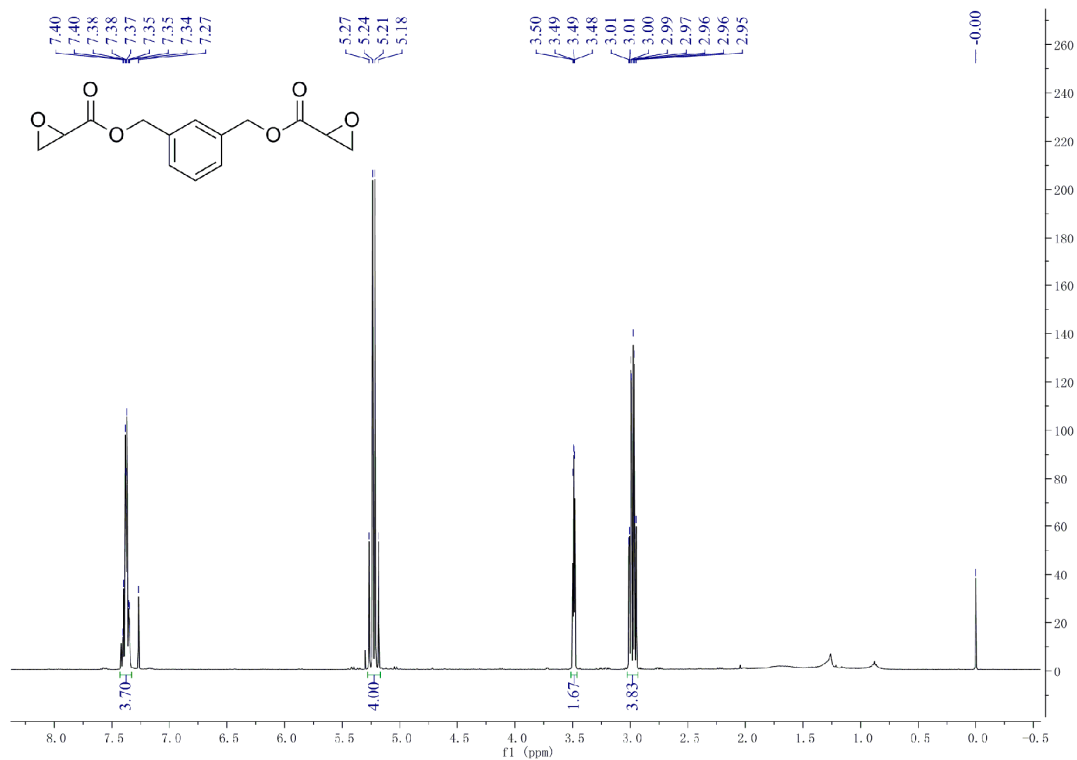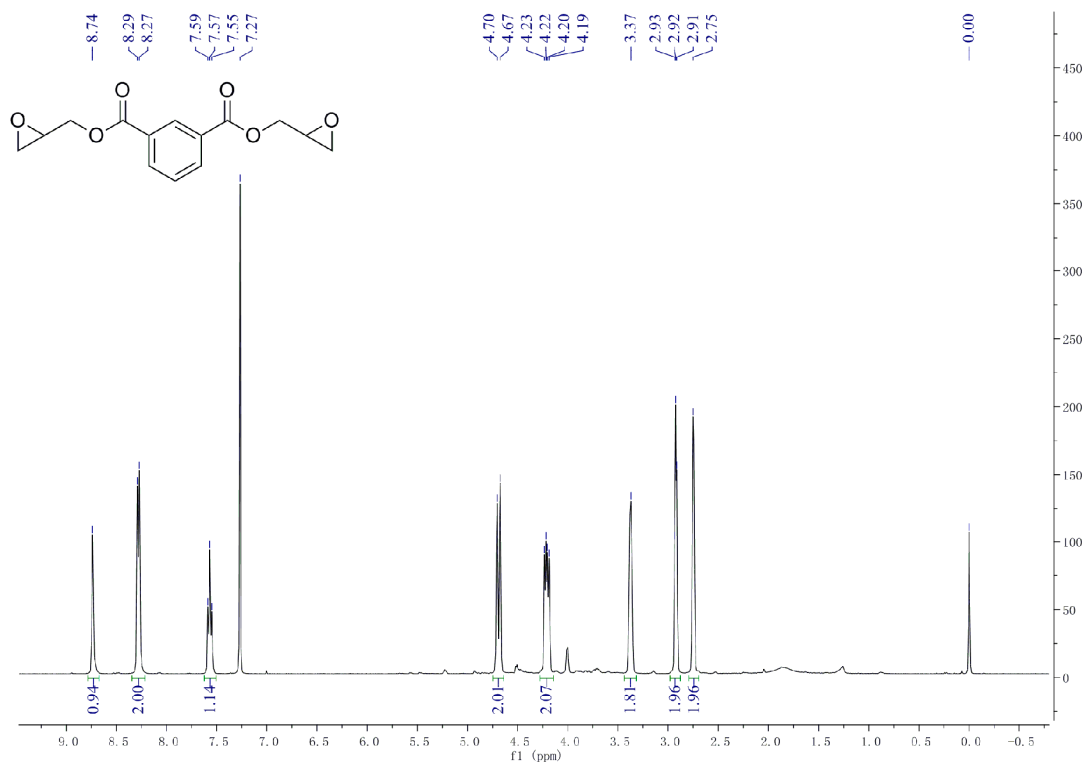

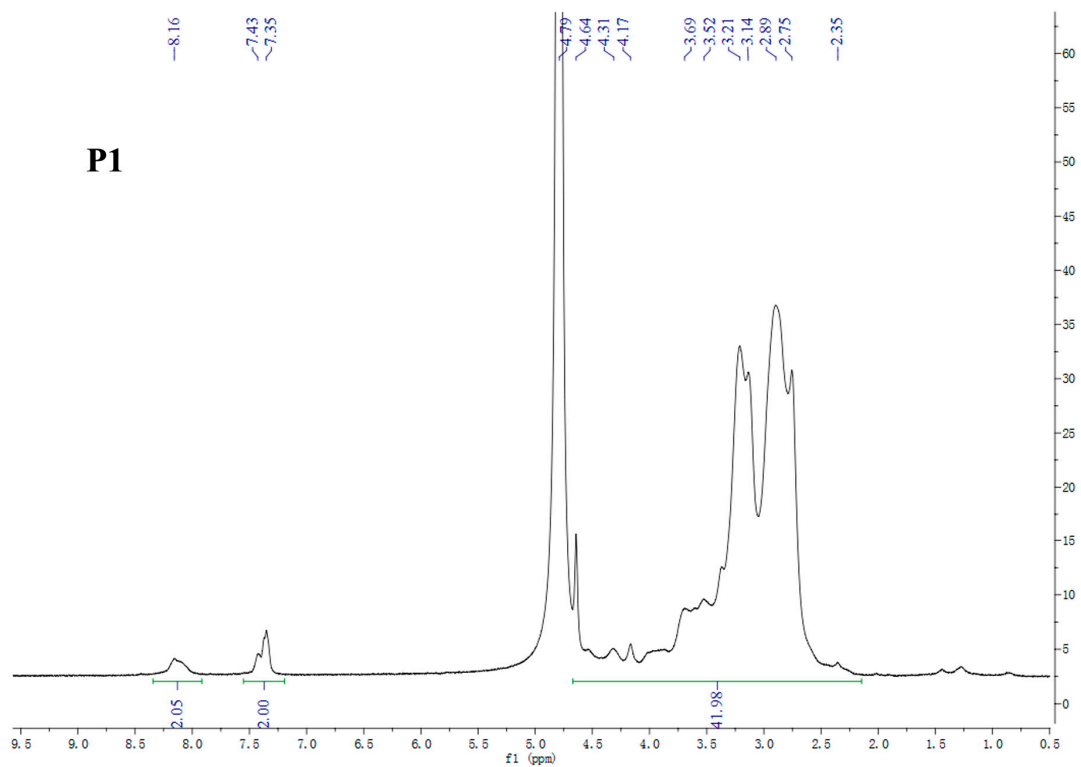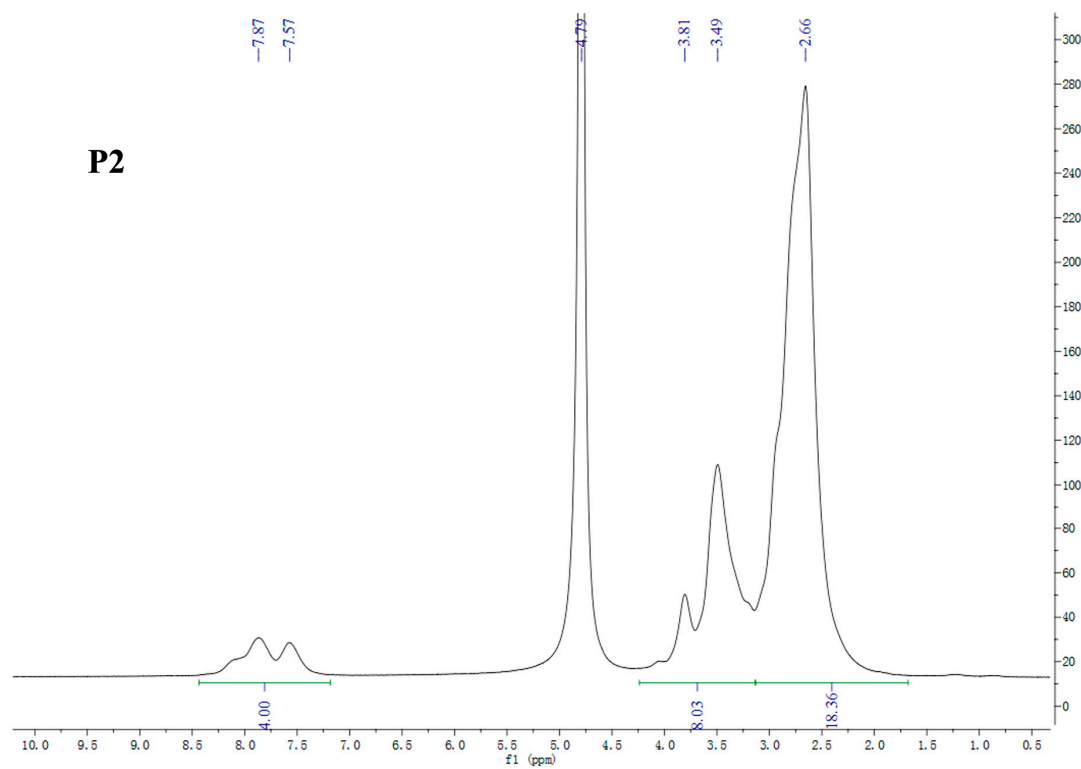

b.  $^{13}\text{C}$ -NMR Spectra

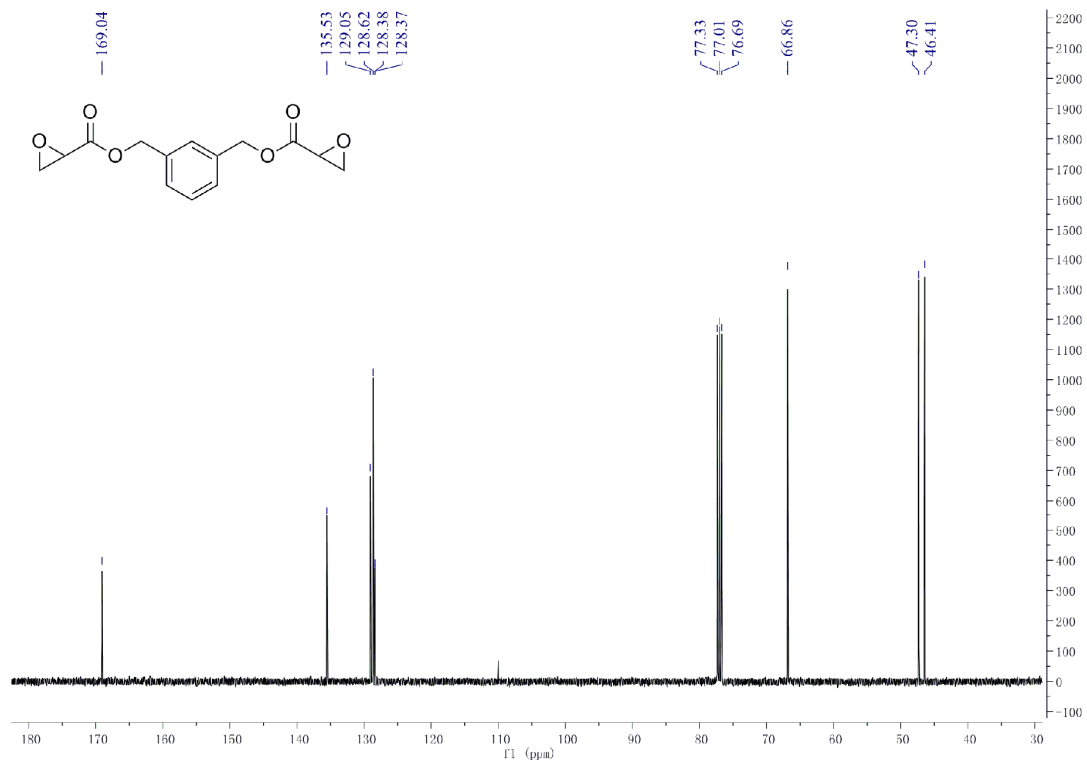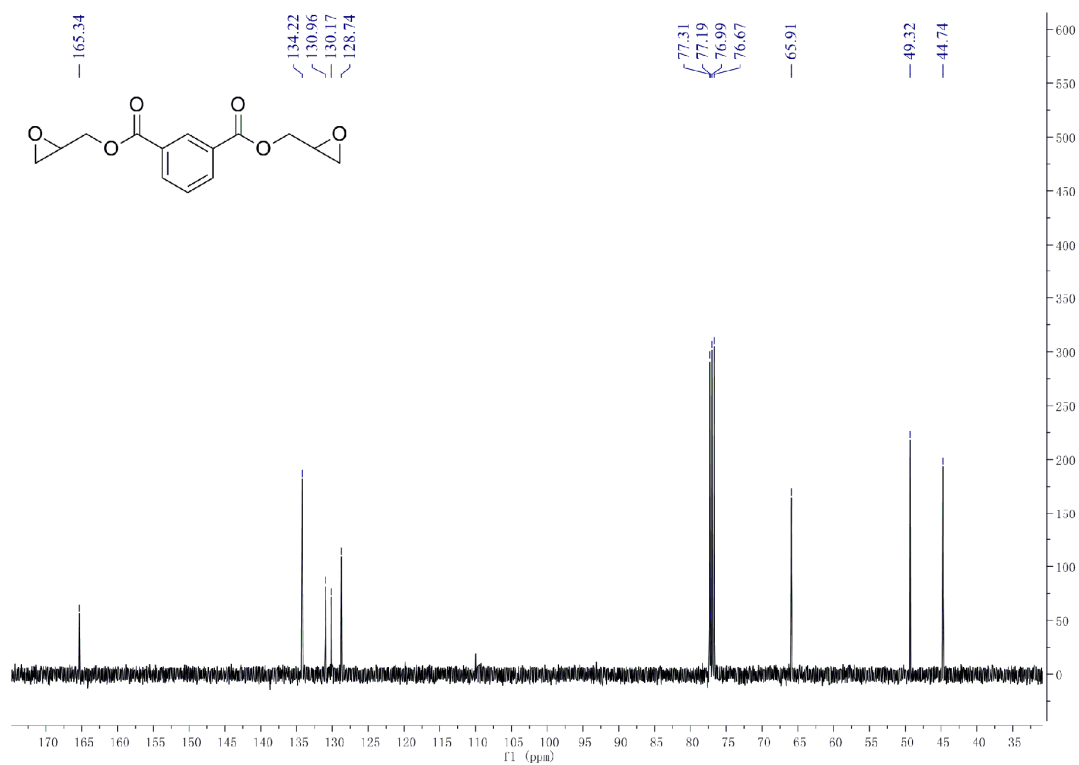

Supplement: s1 [file s1]
